# Supplementary material for: The role played by invasive species in interactions with endangered and threatened species in the United States: a systematic review
Source: Springer Nature journal article supplement (doi:10.1007/s10531-018-1595-x), 2018-08-14
Supplement: MOESM2 [file 16038250]

## Supplementary material 2. List of 107 references selected in this systematic review

The role played by invasive species in interactions with endangered and threatened species in the United States: a systematic review

Biodiversity and Conservation

Manuel Angel Dueñas<sup>1,3\*</sup>, Holly J. Ruffhead<sup>1</sup>, Nicola H. Wakefield<sup>1</sup>, Philip D. Roberts<sup>1</sup>, David J. Hemming<sup>1</sup>, Hilda Diaz-Soltero<sup>2</sup>

<sup>1</sup>CABI, Nosworthy Way, Wallingford, OX10 8DE, UK.

<sup>2</sup>US Department of Agriculture, Washington, DC 20250, USA.

<sup>3</sup>Centre for Ecology & Hydrology, Benson Lane, Crowmarsh Gifford, Wallingford, OX10 8BB, UK.

\*(manuelangel.duenas@gmail.com)

### References:

Ainley DG, Podolsky RR, NUR N, Deforest L, Spencer GA, (2001). Status and population trends of the Newell's Shearwater on Kauai: A model for threatened petrels on urbanized tropical oceanic islands. *Studies in Avian Biology*, 22:108-123.

Allen CR, Forsy EA, Rice KG, Wojcik DP, (2001). Effects of fire ants (Hymenoptera: Formicidae) on hatching turtles and prevalence of fire ants on sea turtle nesting beaches in Florida. *Florida Entomologist*, 250-253.

Amidon F, Marshall AP, Kessler CC, (2010). Status of the Micronesian Megapode in the Commonwealth of the Northern Mariana Islands. Honolulu, HI : U.S. Fish and Wildlife Service.

Aplet GH, Laven RD, (1993). Relative performance of four Hawaiian shrubby plants (Asteraceae) under greenhouse conditions with implications for rarity. *Biological Conservation*, 65:15-21

Atkinson CT, Lease JK, Dusek RJ, Samuel MD, (2005). Prevalence of pox-like lesions and malaria in forest bird communities on leeward Mauna Loa Volcano, Hawaii. *The Condor*, 107(3):537-546.

Barrows C, Allen E, Brooks M, et al. (2009). Effects of an invasive plant on a desert sand dune landscape. *Biological Invasions*, 11:673-686

Baskett CA, Emery SM, Rudgers JA, (2011). Pollinator visits to threatened species are restored following invasive plant removal. *International Journal of Plant Sciences*, 172:411-422

Baumann JR, Kwak TJ, (2011). Trophic relations of introduced flathead catfish in an Atlantic river. *Transactions of the American Fisheries Society*, 140:1120-1134

Blanchet S, Loot G, Bernatchez L, Dodson JJ, (2007). The disruption of dominance hierarchies by a non-native species: an individual-based analysis. *Oecologia*, 152:569-581

Burrowes PA, Joglar RL, Green DE, (2004). Potential causes for amphibian declines in Puerto Rico. *Herpetologica*, 60(2):141-154.

Cabin RJ, Weller SG, Lorence DH, Cordell S, Hadway LJ, Montgomery R, Don Goo D, Urakami A, (2002). Effects of light, alien grass, and native species additions on hawaiian dry forest restoration. *Ecological Applications*, 12(6):1595-1610.

- Campomizzi AJ, Morrison ML, Farrell SL, et al. (2009). Red imported fire ants can decrease songbird nest survival. *Condor*, 111:534-537
- Carlsen TM, Menke JW, Pavlik BM, (2000). Reducing competitive suppression of a rare annual forb by restoring native California perennial grasslands. *Restoration Ecology*, 8:18-29.
- Cattau CE, Martin J, Kitchens WM, (2010). Effects of an exotic prey species on a native specialist: example of the snail kite. *Biological Conservation*, 143:513-520.
- Coblentz BE, Coblentz BA, (1985). Control of the Indian mongoose *Herpestes auropunctatus* on St John, US Virgin Islands. *Biological Conservation*, 33:281-288.
- Coonan TJ, Schwemm CA, Roemer GW, et al. (2005). Decline of an island fox subspecies to near extinction. *Southwestern Naturalist*, 50:32-41
- D'Amore A, Kirby E, Hemingway V, (2009a). Reproductive interference by an invasive species: an evolutionary trap? *Herpetological Conservation and Biology*, 4:325-330
- D'Amore A, Kirby E, McNicholas M, (2009b). Invasive species shifts ontogenetic resource partitioning and microhabitat use of a threatened native amphibian. *Aquatic Conservation: Marine and Freshwater Ecosystems*, 19:534-541
- Dangremond EM, Pardini, EA, Knight TM, (2010). Apparent competition with an invasive plant hastens the extinction of an endangered lupine. *Ecology*, 91(8):2261-2271.
- Davidson EW, Parris M, Collins JP, Longcore JE, Pessier AP, Brunner J, (2003). Pathogenicity and transmission of chytridiomycosis in tiger salamanders (*Ambystoma tigrinum*). *Copeia*, (3): 601-607.
- Diffie S, Miller J, Murray K, (2010). Laboratory observations of red imported fire ant (Hymenoptera: Formicidae) predation on reptilian and avian eggs. *Journal of Herpetology*, 44:294-296
- Dove CJ, Snow RW, Rochford MR, Mazzotti FJ, (2011). Birds consumed by the invasive Burmese python (*Python molurus bivittatus*) in Everglades National Park, Florida, USA. *The Wilson Journal of Ornithology*, 123:126-131
- Dugger KM, Anthony RG, Andrews LS, (2011). Transient dynamics of invasive competition: barred owls, spotted owls, habitat, and the demons of competition present. *Ecological Applications*, 21:2459-2468
- Ellis BK, Stanford JA, Goodman D, et al. (2011). Long-term effects of a trophic cascade in a large lake ecosystem. *Proceedings of the National Academy of Sciences of the United States of America*, 108:1070-1075
- Engeman R, Whisson D, Quinn J, et al. (2006). Monitoring invasive mammalian predator populations sharing habitat with the critically endangered Puerto Rican parrot *Amazona vittata*. *Oryx*, 40:95-102
- Engeman RM, Duffiney A, Braem S, et al. (2010). Dramatic and immediate improvements in insular nesting success for threatened sea turtles and shorebirds following predator management. *Journal of Experimental Marine Biology and Ecology*, 395:147-152
- Epperson DM, Heise CD, (2003). Nesting and hatchling ecology of gopher tortoises (*Gopherus polyphemus*) in southern Mississippi. *Journal of Herpetology*, 37(2):315-324.
- Erwin TL, Young TP, (2010). A native besieged: Effects of normative frugivores and ground vegetation on seed removal in a highly endangered Hawaiian shrub, *Delissea rhytidosperra* (Campanulaceae). *Pacific Science*, 64:33-43.
- Fellers GM, Green DE, Longcore JE, (2001). Oral chytridiomycosis in the Mountain Yellow-legged Frog (*Rana muscosa*). *Copeia*, pp.945-953.

- Fellows MQN, Zedler JB, (2005). Effects of the non-native grass, *Parapholis incurva* (Poaceae), on the rare and endangered hemiparasite, *Cordylanthus maritimus* subsp. *Maritimus* (Scrophulariaceae). *Madroño*, 52:91-98
- Finlay JC, Vredenburg VT, (2007). Introduced trout sever trophic connections in watersheds: consequences for a declining amphibian. *Ecology*, 88:2187-2198
- Fitzpatrick BM, Johnson JR, Kump DK, et al. (2010). Rapid spread of invasive genes into a threatened native species. *Proceedings of the National Academy of Sciences of the United States of America*, 107:3606-3610
- Fitzpatrick BM, Shaffer HB, (2007). Hybrid vigor between native and introduced salamanders raises new challenges for conservation. *Proceedings of the National Academy of Sciences of the United States of America*, 104:15793-15798
- Flint E, Rehkemper C, (2003). Control and eradication of the introduced grass, *Cenchrus echinatus*, at Laysan Island, Central Pacific Ocean. *Proceedings of the International Conference on Eradication of Island Invasives*. IUCN SSC Invasive Species Specialist Group. IUCN, Gland, Switzerland and Cambridge, UK. No.27, pp. 110-115
- Frank PA, Humphrey SR, (1996). Populations, habitat requirements, and management of the endemic Anastasia Island beach mouse (*Peromyscus polionotus phasma*), emphasizing the potential threat of exotic house mice (*Mus musculus*). Submitted as Final Report for Florida Game and Fresh Water Fish Commission Project NG88-006.
- Freed LA, Cann RL, (2009). Negative effects of an introduced bird species on growth and survival in a native bird community. *Current Biology*, 19:1736-1740
- Freed LA, Cann RL, (2012). Increase of an introduced bird competitor in old-growth forest associated with restoration. *NeoBiota*, 13:43-60.
- Freed LA, Cann RL, Bodner GR, (2008). Incipient extinction of a major population of the Hawaii akepa owing to introduced species. *Evolutionary Ecology Research*, 10:931-965.
- Gaertner JP, McHenry D, Forstner MRJ, Hahn D, (2010). Annual variation of *Batrachochytrium dendrobatidis* in the Houston Toad (*Bufo houstonensis*) and a sympatric congener (*Bufo nebulifer*). *Herpetol. Rev.*, 41(4):456-459.
- Gonynor JL, Yabsley MJ, Jensen JB, (2011). A preliminary survey of *Batrachochytrium dendrobatidis* exposure in hellbenders from a stream in Georgia, USA. *Herpetol. Rev.*, 42:58-59.
- Hadfield MG, Miller SE, Carwile AH, (1993). The Decimation of Endemic Hawai'ian Tree Snails by Alien Predators. *American Zoologist*, 33(6):610-622.
- Heath SR, Kershner EL, Cooper DM, et al. (2008). Rodent control and food supplementation increase productivity of endangered San Clemente loggerhead shrikes (*Lanius ludovicianus mearnsi*). *Biological Conservation*, 141:2506-2515
- Hess SC, Banko PC, Goltz DM, Danner RM, Brinck KW, (2004). Strategies for reducing feral cat threats to endangered Hawaiian birds. *Proceedings: Vertebrate Pest Conference*, 21:21-26.
- Hess SC, Hansen H, Banko PC, (2008). Reducing feral cat threats to native wildlife in Hawai'i. Technical Report HCSU-010. Hawai'i Cooperative Studies Unit, University of Hawai'i at Hilo, Hawai'i.
- Holden PB, Golden ME, Zucker SJ, (2001). An evaluation of changes in woundfin (*Plagopterus argentissimus*) populations in the Virgin River, Utah, Arizona, and Nevada, 1976-1999. Report PR-735-1 by BIO-WEST, Inc., Logan, Utah. 77pp.
- Hoshide HM, Price A J, Katahira L, (1990). A progress report on nene *Branta sandvicensis* in Hawaii Volcanoes National Park from 1974-89. *Wildfowl*, 41: 152-155.
- Hueneke LF, Thomson JK, (1995). Potential interference between a threatened endemic thistle and an invasive nonnative plant. *Conservation Biology*, 9:416-425

- Huxel GR, (2000). The effect of the Argentine ant on the threatened valley elderberry longhorn beetle. *Biological Invasions*, 2:81-85
- Joe S, Daehler C, (2008). Invasive slugs as under-appreciated obstacles to rare plant restoration: evidence from the Hawaiian Islands. *Biological Invasions*, 10:245-255
- Kennedy TA, Finlay JC, Hobbie SE, (2005). Eradication of invasive *Tamarix ramosissima* along a desert stream increases native fish density. *Ecological Applications*, 15(6):2072-83.
- Kessler CC, (2002). Eradication of feral goats and pigs and consequences for other biota on Sarigan Island, Commonwealth of the Northern Mariana Islands. *Proceedings of the International Conference on Eradication of Island Invasives*. IUCN SSC Invasive Species Specialist Group. IUCN, Gland, Switzerland and Cambridge, UK. 132-141.
- Klinger RC, Schuyler P, and Sterner JD, (2002). The response of herbaceous vegetation and endemic plant species to the removal of feral sheep from Santa Cruz Island, California. *Proceedings of the International Conference on Eradication of Island Invasives*. IUCN SSC Invasive Species Specialist Group. IUCN, Gland, Switzerland and Cambridge, UK. No. 27. pp. 141-154
- Knight D, (2001). From birds in the hand to birds in the bush. *California Wild*, 53(2).
- Koenig WD, (2003). European starlings and their effect on native cavity-nesting birds. *Conservation Biology*, 17:1134-1140
- Kornis MS, Sharma S, and Jake Vander Zanden, M, (2013). Invasion success and impact of an invasive fish, round goby, in Great Lakes tributaries. *Diversity and Distributions*, 19(2):184-198.
- Kornis MS, Sharma S, Vander Zanden MJ, (2012). Invasion success and impact of an invasive fish, round goby, in Great Lakes Tributaries. *Diversity and Distributions*, 19:184-198
- Lafferty K, Page C, (1997). Predation on the endangered tidewater goby, *Eucyclogobius newberryi*, by the introduced African clawed frog, *Xenopus laevis*, with notes on the frog's parasites. *Copeia*, 3:589-592.
- Levin PS, Achord S, Feist BE, Zabel RW, (2002). Non-indigenous brook trout and the demise of Pacific salmon: a forgotten threat?. *Proceedings of the Royal Society of London B: Biological Sciences*, 269(1501):1663-1670.
- Lewis PA, DeLoach CJ, Herr JC, Dudley TL, Carruthers RI, (2003). Assessment of risk to native *Frankenia* shrubs from an Asian leaf beetle, *Diorhabda elongata deserticola* (Coleoptera: Chrysomelidae), introduced for biological control of saltcedars (*Tamarix* spp.) in the western United States. *Biological Control*, 27:148-166
- Louda SM, Rand TA, Arnett AE, et al. (2005). Evaluation of ecological risk to populations of a threatened plant from an invasive biocontrol insect. *Ecological Applications*, 15:234-249
- MacNally R, Thomson JR, Kimmerer WJ, et al. (2010). Analysis of pelagic species decline in the upper San Francisco Estuary using multivariate autoregressive modeling (MAR). *Ecological Applications*, 20:1417-1430
- Malcolm TR, Swinnerton KJ, Groombridge JJ, et al. (2008). Ground-based rodent control in a remote Hawaiian rainforest on Maui. *Pacific Conservation Biology*, 14:206-214
- Maret TJ, Snyder JD, Collins JP, (2006). Altered drying regime controls distribution of endangered salamanders and introduced predators. *Biological Conservation*, 127:129-138
- Marsh PC, Douglas ME, (1997). Predation by introduced fishes on endangered humpback chub and other native species in the Little Colorado River, Arizona. *Transactions of the American Fisheries Society*, 126:343-346
- McEachern AK, Thomson DM, Chess KA, (2009). Climate alters response of an endemic island plant to removal of invasive herbivores. *Ecological Applications*, 19:1574-1584

- McGrath CC, Lewis Jr WM, (2007). Competition and predation as mechanisms for displacement of greenback cutthroat trout by brook trout. *Transactions of the American Fisheries Society*, 136(5):1381-1392.
- Meckstroth A M, Miles A K Chandras S, (2007). Diets of introduced predators using stable isotopes and stomach contents. *Journal of Wildlife Management*, 71:2387-2392.
- Medina FM, Bonnaud E, Vidal E, Tershy BR, Zavaleta ES, Josh Donlan C, Keitt BS, Corre M, Horwath SV, Nogales M, (2011). A global review of the impacts of invasive cats on island endangered vertebrates. *Global Change Biology*, 17(11):3503-3510.
- Meeuwig MH, Guy CS, Fredenberg WA, (2011). Trophic relationships between a native and a nonnative predator in a system of natural lakes. *Ecology of Freshwater Fish*, 20:315-325
- Meffe GK, Hendrickson DA, Minckley WL, Rinne JN, (1983). Factors resulting in decline of the endangered Sonoran topminnow *Poeciliopsis occidentalis* (Atheriniformes: Poeciliidae) in the United States. *Biological Conservation*, 25(2):135-159
- Messing RH, Tremblay MN, Mondor EB, Footitt RG, Pike KS, (2007). Invasive aphids attack native Hawaiian plants. *Biological Invasions*, 9:601-607.
- Morehouse EA, James TY, Ganley ARD, Vilgalys R, Berger L, et al. (2003). Multilocus sequence typing suggests the chytrid pathogen of amphibians is a recently emerged clone. *Mol. Ecol.* 12: 395-403.
- Morgan JAT, Vredenburg VT, Rachowicz LJ, Knapp RA, Stice MJ, et al. (2007). Population genetics of the frog killing fungus *Batrachochytrium dendrobatidis*. *Proc Natl Acad Sci USA*, 104: 13845-13850.
- Morin MP, (1998). Endangered waterbird and wetland status, Kaloko- Honokohau National Historical Park, Hawai'i Island. Cooperative National Park Resources Studies Unit, Hawai'i Technical Report 119:62
- Mountainspring S, Casey TL, Kepler CB, et al. (1990). Ecology, behavior, and conservation of the poo-uli (*Melamprosops phaeosoma*). *Wilson Bulletin*, 102:109-122
- Munk LM, Hild AL, Whitson TD, (2002). Rosette recruitment of a rare endemic forb (*Gaura neomexicana* subsp. *coloradensis*) with canopy removal of associated species. *Restoration Ecology*, 10:122-128.
- Nellis DW, Small V, (1983). Mongoose predation on sea turtle eggs and nests. *Biotropica*, 15, 159-160.
- Padgett-Flohr GE, Longcore JE, (2005). Detection of *Batrachochytrium dendrobatidis* in a wild population of *Ambystoma californiense*. *Herpetol. Rev.*, 36:50-51.
- Philibosian R, Ruibal R, (1971). Conservation of the lizard *Ameiva polops* in the Virgin Islands. *Herpetologica*, 27:450-454
- Pletschet SM, Kelley JF, (1990). Breeding biology and nesting success of Palila. *Condor*, 92: 1012-1021.
- Pucci JR, (2007). Effects of invasive plants on the endangered sunflower, *Pentachaeta Lyonii* Gray. Ph.D. California State University, Northridge.
- Rauzon MJ, Drigot DC, (2002). Red mangrove eradication and pickleweed control in a Hawaiian wetland, waterbird responses, and lessons learned. *Proceedings of the International Conference on Eradication of Island Invasives*. IUCN SSC Invasive Species Specialist Group. IUCN, Gland, Switzerland and Cambridge, UK. No. 27. pp. 240-248.
- Reagan SR, Ertel JM, Wright VL, (2000). David and Goliath retold: fire ants and alligators. *J Herpetol.*, 34:475-78.
- Reichel JD, Wiles GJ, Glass PO, (1992). Island extinctions: the case of the endangered nightingale reed-warbler. *Wilson Bull.*, 104: 44-54.

- Richards DC, (2004). Competition between the threatened Bliss Rapids snail *Taylorconcha serpenticola* (Hershler et al.) and the invasive, aquatic snail, *Potamopyrgus antipodarum* (Gray). Ph.D. Dissertation, Montana State University, Bozeman, Montana.
- Riley SP, Bradley Shaffer H, Randal Voss S, Fitzpatrick BM, (2003). Hybridization between a rare, native tiger salamander (*Ambystoma californiense*) and its introduced congener. *Ecological applications*, 13(5):1263-1275.
- Roemer GW, (1999). The ecology and conservation of the island fox (*Urocyon littoralis*). Ph.D. dissertation, University of California, Los Angeles. 229 pp.
- Roemer GW, Coonan TJ, Garcelon DK, et al. (2001). Feral pigs facilitate hyperpredation by golden eagles and indirectly cause the decline of the island fox. *Animal Conservation*, 4:307-318
- Rushton SP, Wood DJA, Lurz PWW, et al. (2006). Modelling the population dynamics of the Mt. Graham red squirrel: Can we predict its future in a changing environment with multiple threats? *Biological Conservation*, 131:121-131
- Ryan ME, Johnson JR, Fitzpatrick BM, (2009). Invasive hybrid tiger salamander genotypes impact native amphibians. *Proceedings of the National Academy of Sciences of the United States of America*, 106:11166-11171
- Savidge, JA, (1987). Extinction of an island forest avifauna by an introduced snake. *Ecology*, 68:660-668.
- Schloesser DW, Kovalak WP, Longton GD, Ohnesorg KL, Smithee RD, (1998). Impact of zebra and quagga mussels (*Dreissena* spp.) on freshwater unionids (*Bivalvia: Unionidae*) in the Detroit River of the Great Lakes. *The American Midland Naturalist*, 140:299-313
- Scott TA, Morrison ML, (1990). Natural History and Management of the San Clemente Loggerhead Shrike. *Proceedings of the Western Foundation of Vertebrate Zoology*, 4:23-57
- Severns PM, (2008). Exotic grass invasion impacts fitness of an endangered prairie butterfly, *Icaricia icarioides fenderi*. *Journal of Insect Conservation*, 12:651-661
- Sieg CH, Bjugstad AJ, (1994). Five years of following the western prairie fringed orchid (*Platanthera praeclara*) on the Sheyenne National Grassland, North Dakota. *Proceedings of the Thirteenth North American Prairie Conference*. Windsor, ON, Canada: Department of Parks and Recreation. Vol. 141, p. 146.
- Simon J C, Pratt T K, Berlin K E, Kowalsky J R, (2001). Reproductive ecology and demography of the 'Ōkohekohe. *The Condor*, 103:736-745.
- Snetsinger TJ, Herrmann CM, Holmes DE, Hayward CD, Fancy SG, (2005). Breeding ecology of the Puaiohi (*Myadestes palmeri*). *The Wilson Bulletin*, 117(1):72-84.
- Thomson D, (2005). Measuring the effects of invasive species on the demography of a rare endemic plant. *Biological Invasions*, 7:615-624
- Timm, SF, Munson L, Summers BA, Terio KA, Dubovi EJ, Rupprecht CE, Sanjay Kapil S, Garcelon DK, (2009). A suspected canine distemper epidemic as the cause of a catastrophic decline in Santa Catalina island foxes (*Urocyon littoralis catalinae*). *Journal of Wildlife Diseases*, 45:333-343.
- Uyehara KJ, Engilis Jr A, Dugger BD, (2008). Wetland features that influence occupancy by the endangered Hawaiian duck. *Wilson Journal of Ornithology*, 120:311-319
- Van Zwol JA, Neff BD, Wilson CC, (2012). The influence of non-native salmonids on circulating hormone concentrations in juvenile Atlantic salmon. *Animal Behaviour*, 83:119-129
- VanderWerf EA, (2009). Importance of nest predation by alien rodents and avian poxvirus in conservation of o'ahu 'elepaio. *Journal of Wildlife Management*, 73:737-746

VanderWerf EA, Mosher SM, Burt MD, Taylor PE, (2011). Current distribution and abundance of o'ahu 'elepaio (*Chasiempis ibidis*) in the Wai'anae Mountains. *Pacific Science*, 65: 311- 319

Walck JL, Baskin JM, Baskin CC, (1999). Effects of competition from introduced plants on establishment, survival, growth and reproduction of the rare plant *Solidago shortii* (Asteraceae). *Biological Conservation*, 88(2):213-219.

Wiles GJ, Bart J, Beck Jr. RE, Aguon CF, (2003). Impacts of the brown tree snake: patterns of decline and species persistence in Guam's avifauna. *Conservation Biology*, 17(5):1350- 1360.

Wiles GJ, Schreiner IH, Nafus D, et al. (1996). The status, biology, and conservation of *Serianthes nelsonii* (Fabaceae), an endangered Micronesian tree. *Biological Conservation*, 76:229-239

Wiley JW, Post W, Cruz A, (1991). Conservation of the yellow-shouldered blackbird *Agelaius xanthomus*, an endangered West Indian species. *Biological Conservation*, 55:119-138.
